# Supplementary material for: Quantitative Assessment of Climatic and Reservoir-Induced Effects on River Water Temperature Using Bayesian Network-Based Approach
Source: MDPI journal article supplement (doi:10.3390/w14081200), 2022-04-08
Supplement: s1 [file s1]

Archive with 1 entries (1 files):
- water-1621916-supplementary.pdf
