# Supplementary material for: Quantitative Assessment of Climatic and Reservoir-Induced Effects on River Water Temperature Using Bayesian Network-Based Approach
Source: MDPI journal article supplement (doi:10.3390/w14081200), 2022-04-08
Supplement: s1 [file s1 › water-1621916-supplementary.pdf]

Supporting Information for

**Quantitative assessment of climatic and reservoir-induced effects on  
river water temperature using Bayesian network-based approach**

**Authors:** Pengcheng Xu <sup>\*1,2</sup>, Yuankun Wang <sup>\*3</sup>, Dong Wang<sup>2</sup>, Fan Li<sup>1</sup>, Jianchun Qiu<sup>1</sup>

<sup>1</sup>College of Hydraulic Science and Engineering, Yangzhou University,  
Yangzhou, P.R China

<sup>2</sup>Key Laboratory of Surficial Geochemistry, Ministry of Education, Department of  
Hydrosciences, School of Earth Sciences and Engineering, State Key Laboratory of  
Pollution Control and Resource Reuse, Nanjing University, Nanjing, P.R. China

<sup>3</sup>School of Water Resources and Hydropower Engineering, North China Electric  
Power University, Beijing, P.R. China

(\*Corresponding author: Pengcheng Xu, m18994113495@163.com;

Yuankun Wang, yuankunw@nju.edu.cn)

**Table S1(a)** Control parameters for support vector machine (SVM) for pre-TGR period and post-TGR period

| Period   | Month     | Control parameters |                    |
|----------|-----------|--------------------|--------------------|
|          |           | cost <sup>a</sup>  | gamma <sup>b</sup> |
| pre-TGR  | Jan       | 100                | 0.01               |
|          | February  | 1000               | 0.001              |
|          | March     | 100                | 0.01               |
|          | April     | 100                | 0.01               |
|          | May       | 100                | 0.001              |
|          | June      | 100                | 0.001              |
|          | July      | 100                | 0.001              |
|          | August    | 1000               | 0.001              |
|          | September | 1000               | 0.1                |
|          | October   | 1000               | 0.1                |
|          | November  | 100                | 0.001              |
|          | December  | 100                | 0.001              |
| post-TGR | Jan       | 1000               | 0.01               |
|          | February  | 1000               | 0.01               |
|          | March     | 100                | 0.01               |
|          | April     | 1000               | 0.01               |
|          | May       | 100                | 0.001              |
|          | June      | 1000               | 0.001              |
|          | July      | 100                | 0.001              |
|          | August    | 1000               | 0.01               |
|          | September | 1000               | 0.001              |
|          | October   | 100                | 0.01               |
|          | November  | 1000               | 0.0001             |
|          | December  | 1000               | 0.001              |

<sup>a</sup>cost: cost of constraints violation (default: 1)—it is the ‘C’-constant of the regularization term in the Lagrange formulation.

<sup>b</sup>gamma: parameter needed for all kernels.

**Table S1(b)** Control parameters for adaptive-network-based fuzzy inference system (ANFIS) for pre-TGR period and post-TGR period

| Period   | Month     | Control parameters      |                       |                        |                      |
|----------|-----------|-------------------------|-----------------------|------------------------|----------------------|
|          |           | num.labels <sup>a</sup> | max.iter <sup>b</sup> | step.size <sup>a</sup> | type.mf <sup>b</sup> |
| pre-TGR  | January   | 5                       | 20                    | 0.01                   | 3                    |
|          | February  | 7                       | 20                    | 0.01                   | 3                    |
|          | March     | 5                       | 10                    | 0.01                   | 3                    |
|          | April     | 5                       | 20                    | 0.01                   | 3                    |
|          | May       | 5                       | 10                    | 0.01                   | 3                    |
|          | June      | 5                       | 10                    | 0.01                   | 3                    |
|          | July      | 5                       | 10                    | 0.01                   | 3                    |
|          | August    | 5                       | 10                    | 0.01                   | 3                    |
|          | September | 10                      | 10                    | 0.01                   | 3                    |
|          | October   | 5                       | 10                    | 0.01                   | 3                    |
|          | November  | 5                       | 10                    | 0.01                   | 3                    |
|          | December  | 5                       | 10                    | 0.01                   | 3                    |
| post-TGR | January   | 5                       | 10                    | 0.01                   | 3                    |
|          | February  | 10                      | 10                    | 0.01                   | 3                    |
|          | March     | 10                      | 10                    | 0.01                   | 3                    |
|          | April     | 5                       | 10                    | 0.01                   | 3                    |
|          | May       | 5                       | 10                    | 0.01                   | 3                    |
|          | June      | 10                      | 20                    | 0.01                   | 3                    |
|          | July      | 5                       | 10                    | 0.01                   | 3                    |
|          | August    | 5                       | 10                    | 0.01                   | 3                    |
|          | September | 5                       | 10                    | 0.01                   | 3                    |
|          | October   | 5                       | 10                    | 0.01                   | 3                    |
|          | November  | 5                       | 10                    | 0.01                   | 3                    |
|          | December  | 10                      | 10                    | 0.01                   | 3                    |

<sup>a</sup>num.labels: a positive integer to determine the number of labels (linguistic terms);

<sup>b</sup>max.iter: a positive integer to determine the maximal number of iterations;

<sup>c</sup>step.size: the step size of the gradient descent;

<sup>c</sup>type.mf: type of the membership function.

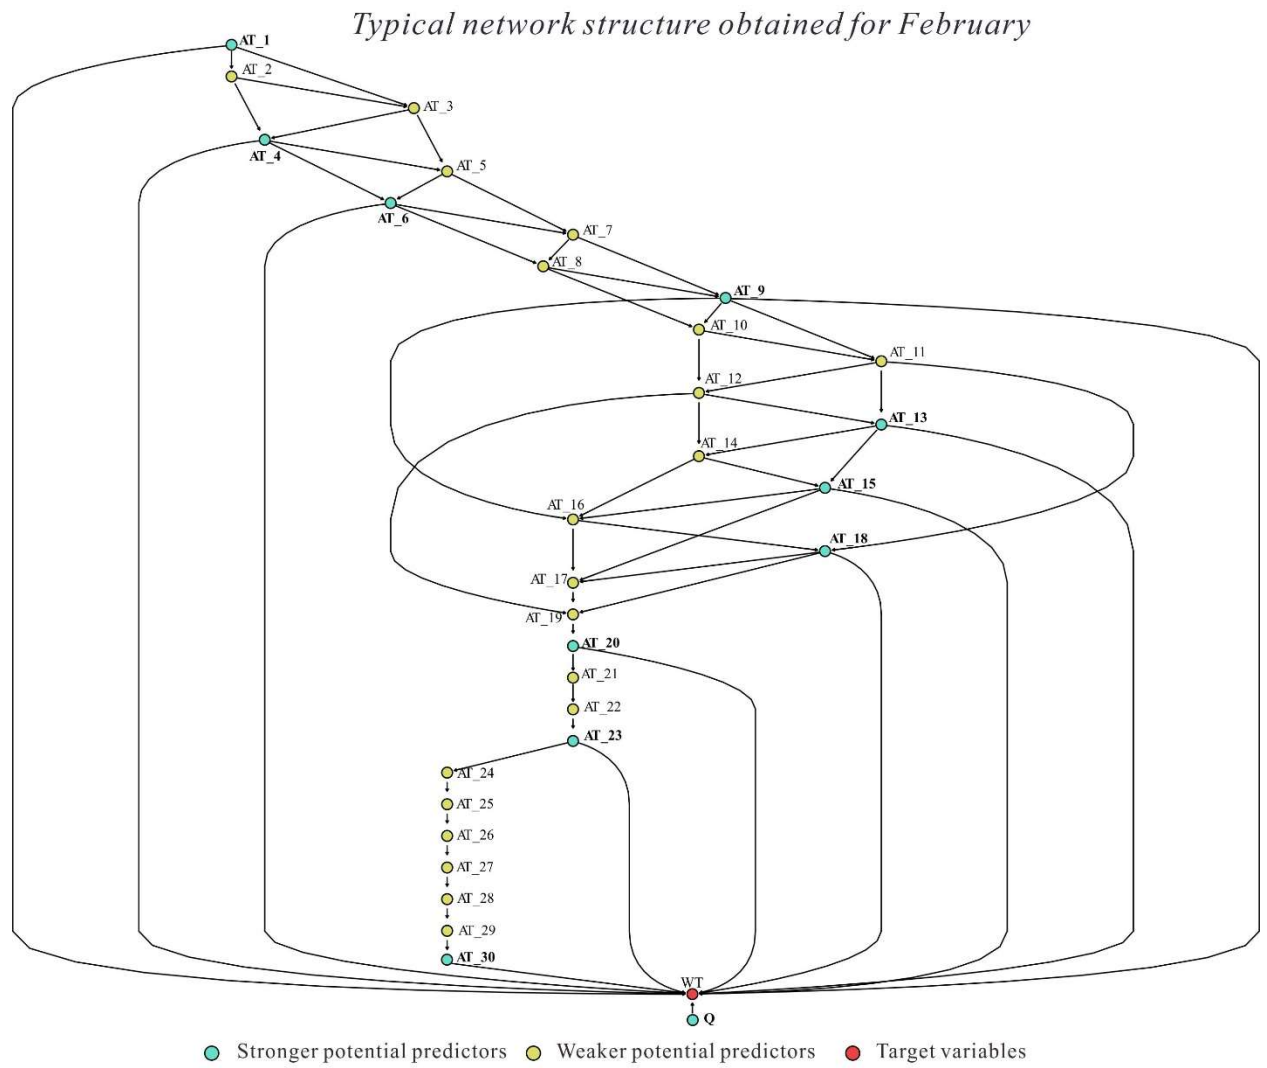

**Figure S1(a)** Typical network structure obtained for February. Notations for the variables are as follows: Water temperature (*WT*), discharge (*Q*). *AT\_1*, *AT\_2*, ..., *AT\_30* represent the lag-1, lag-2, ..., lag-30 for air temperature (*AT*) series. The nodes denoted with blue circle are selected as final potential predictors. *WT* is target variable while other variables are set as input variables.

*Typical network structure obtained for March*

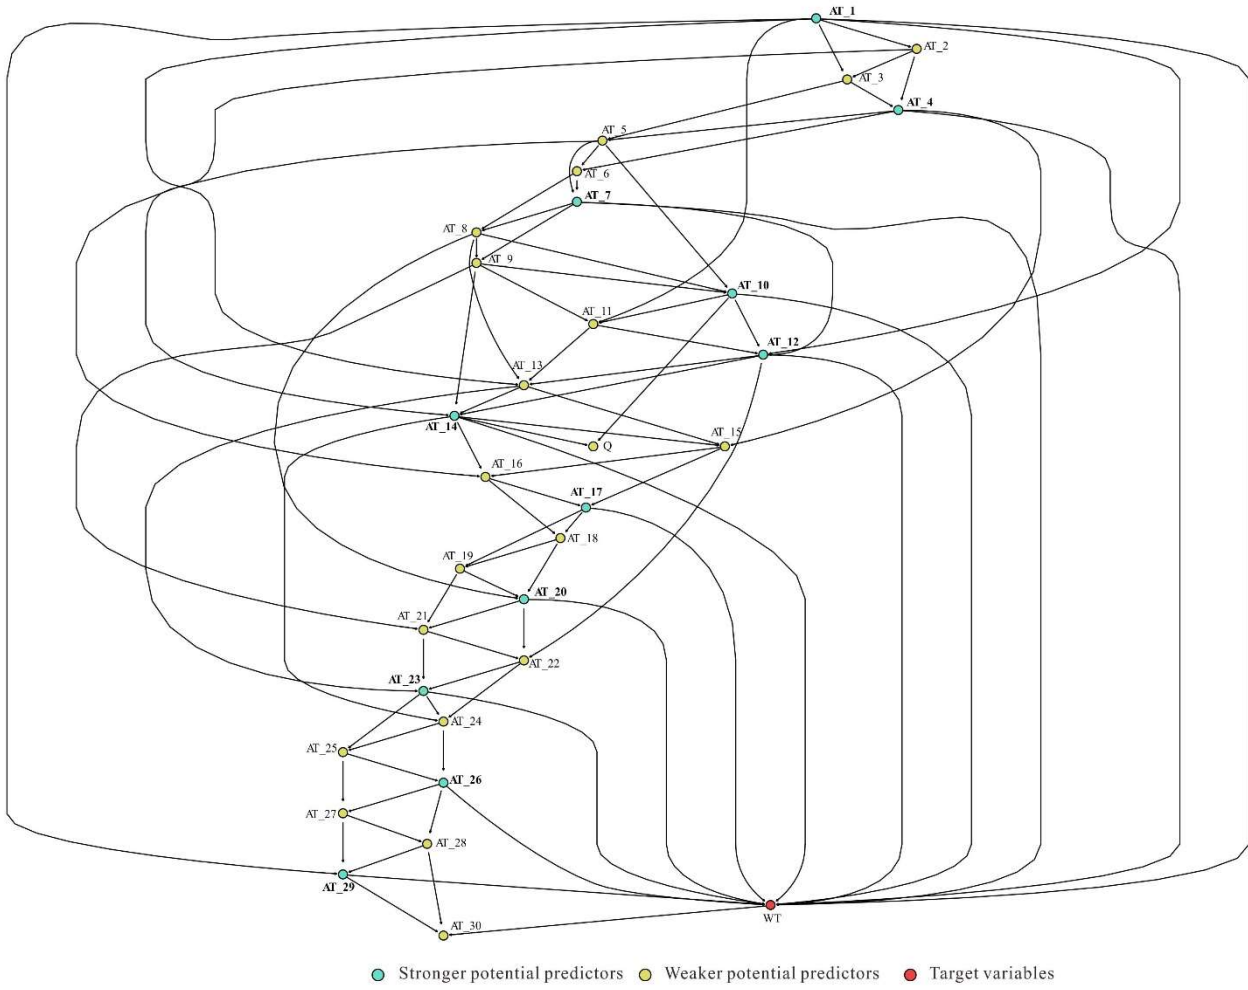

**Figure S1(b)** Typical network structure obtained for March. Notations for the variables are as follows: Water temperature (*WT*), discharge (*Q*). *AT\_1*, *AT\_2*, ..., *AT\_30* represent the lag-1, lag-2, ..., lag-30 for air temperature (*AT*) series. The nodes denoted with blue circle are selected as final potential predictors. *WT* is target variable while other variables are set as input variables.

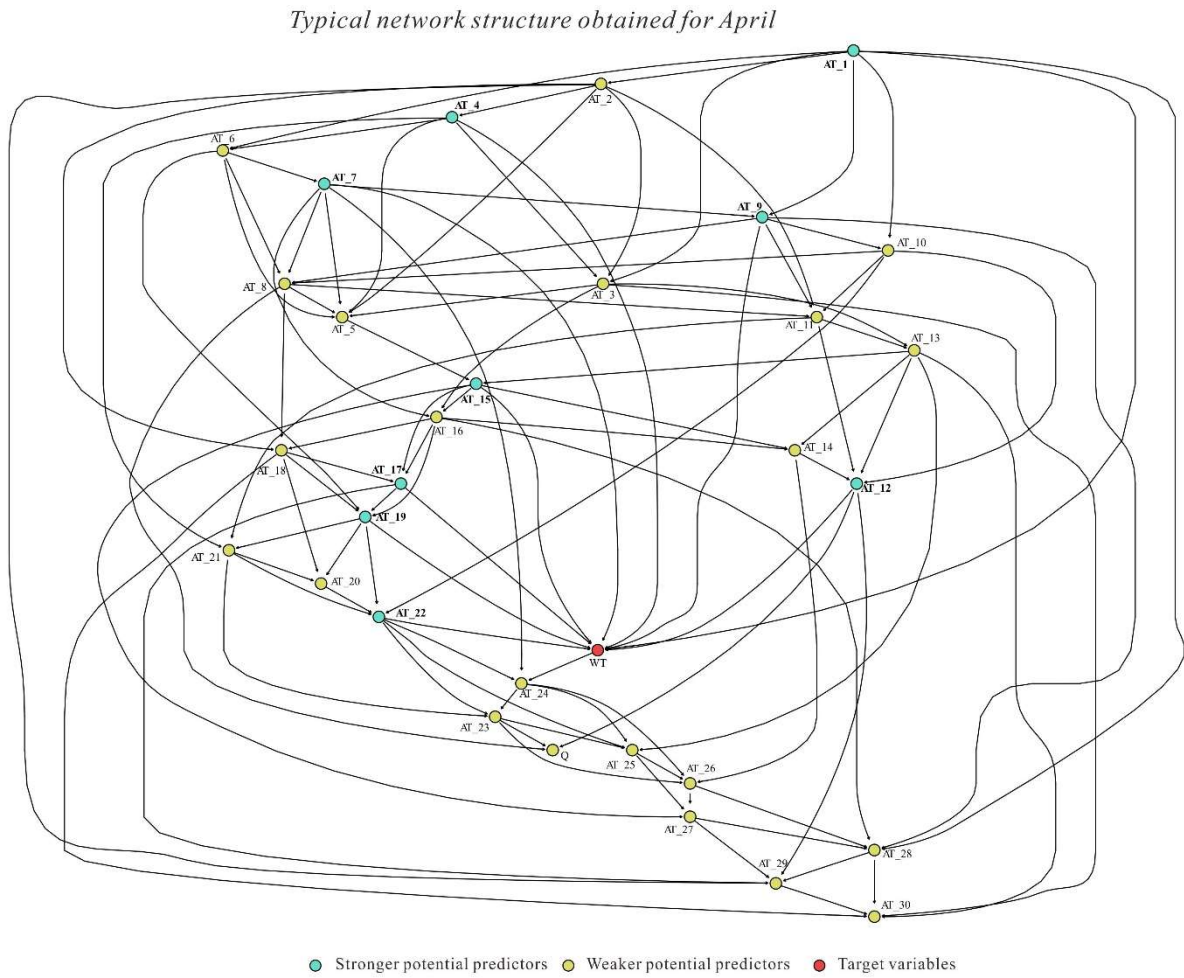

**Figure S1(c)** Typical network structure obtained for April. Notations for the variables are as follows: Water temperature (*WT*), discharge (*Q*). *AT\_1*, *AT\_2*, ..., *AT\_30* represent the lag-1, lag-2, ..., lag-30 for air temperature (*AT*) series. The nodes denoted with blue circle are selected as final potential predictors. *WT* is target variable while other variables are set as input variables.

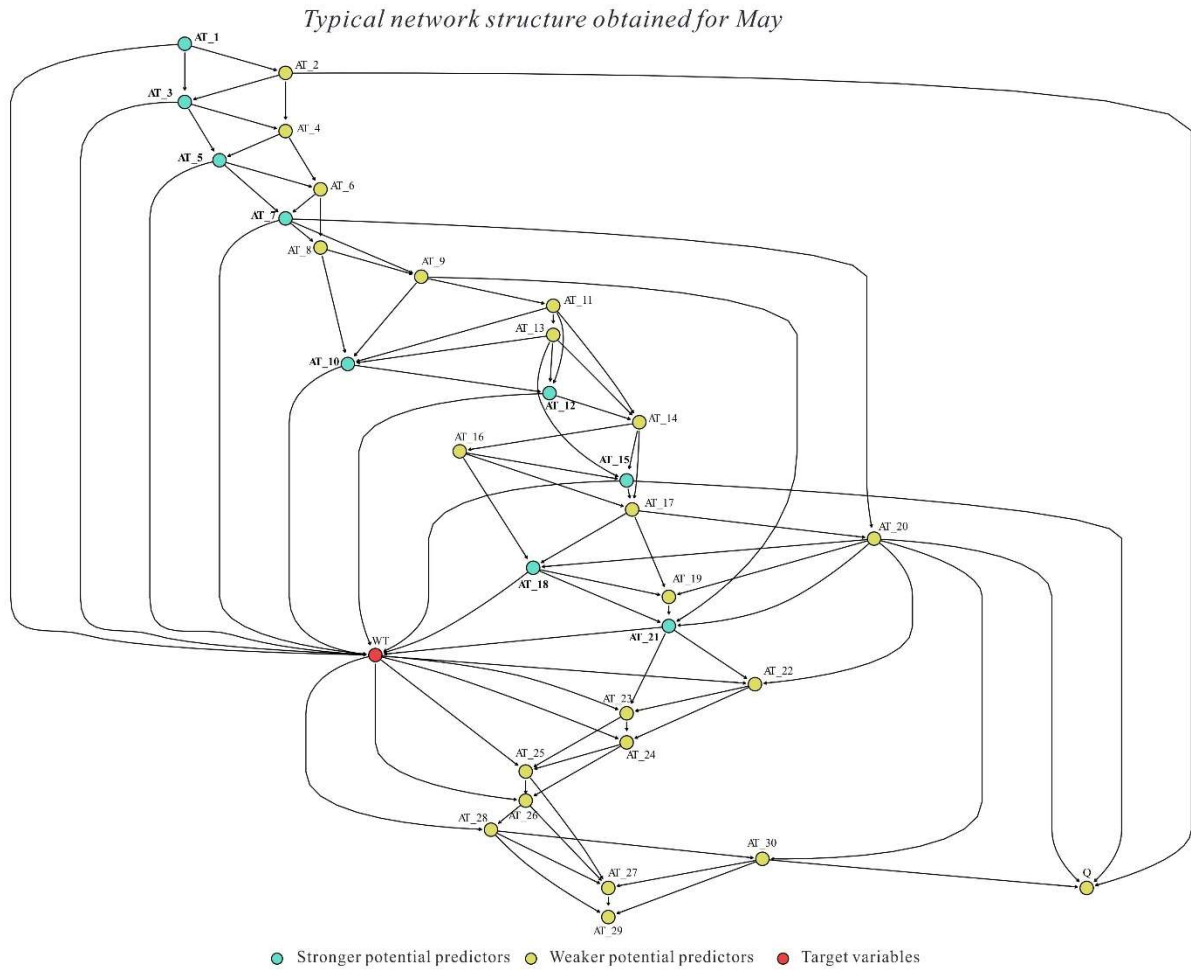

**Figure S1(d)** Typical network structure obtained for May. Notations for the variables are as follows: Water temperature (*WT*), discharge (*Q*). *AT\_1*, *AT\_2*, ..., *AT\_30* represent the lag-1, lag-2, ..., lag-30 for air temperature (*AT*) series. The nodes denoted with blue circle are selected as final potential predictors. *WT* is target variable while other variables are set as input variables.

*Typical network structure obtained for June*

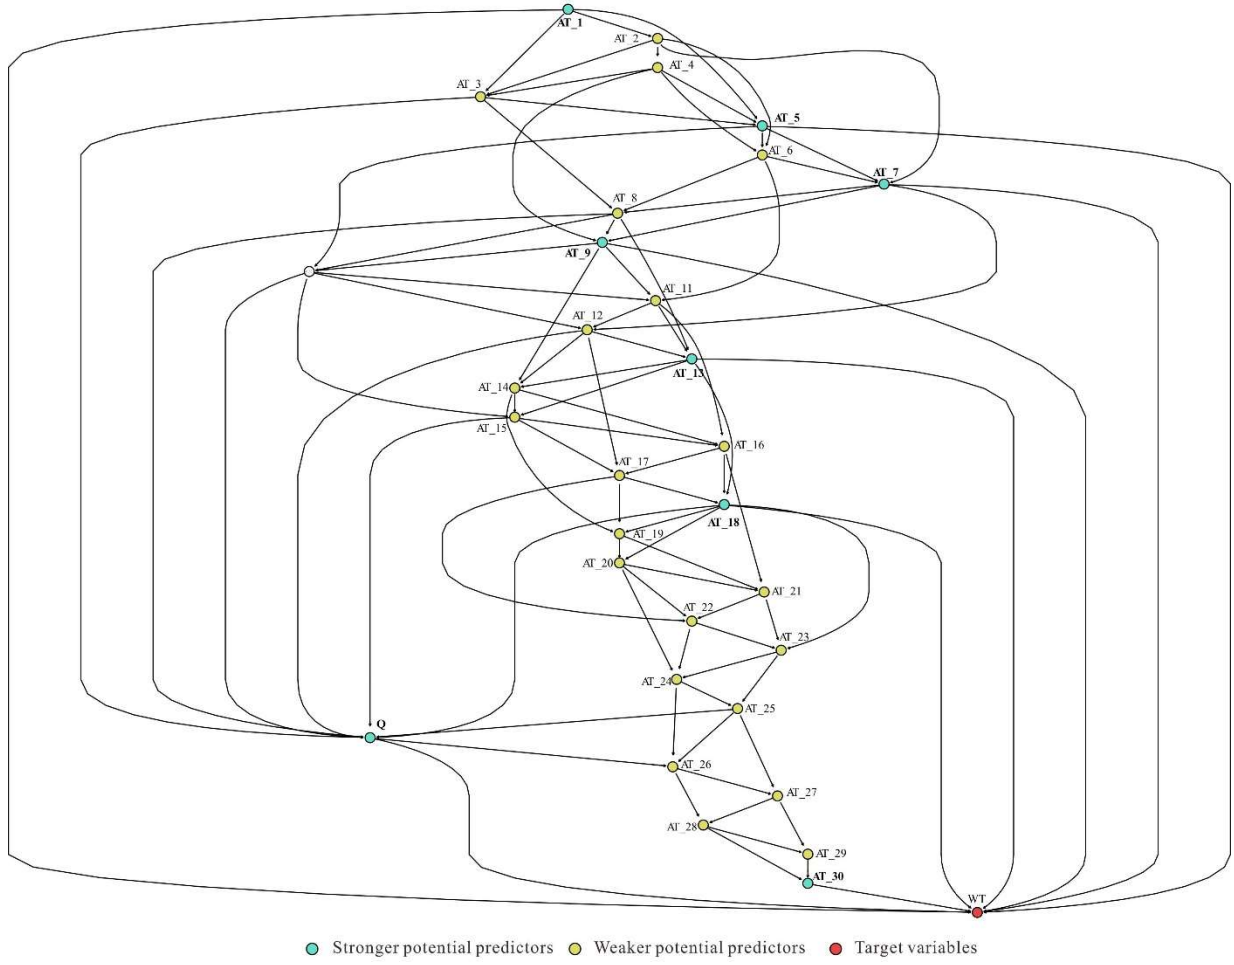

**Figure S1(e)** Typical network structure obtained for June. Notations for the variables are as follows: Water temperature (*WT*), discharge (*Q*). *AT\_1*, *AT\_2*, ..., *AT\_30* represent the lag-1, lag-2, ..., lag-30 for air temperature (*AT*) series. The nodes denoted with blue circle are selected as final potential predictors. *WT* is target variable while other variables are set as input variables.

Typical network structure obtained for July

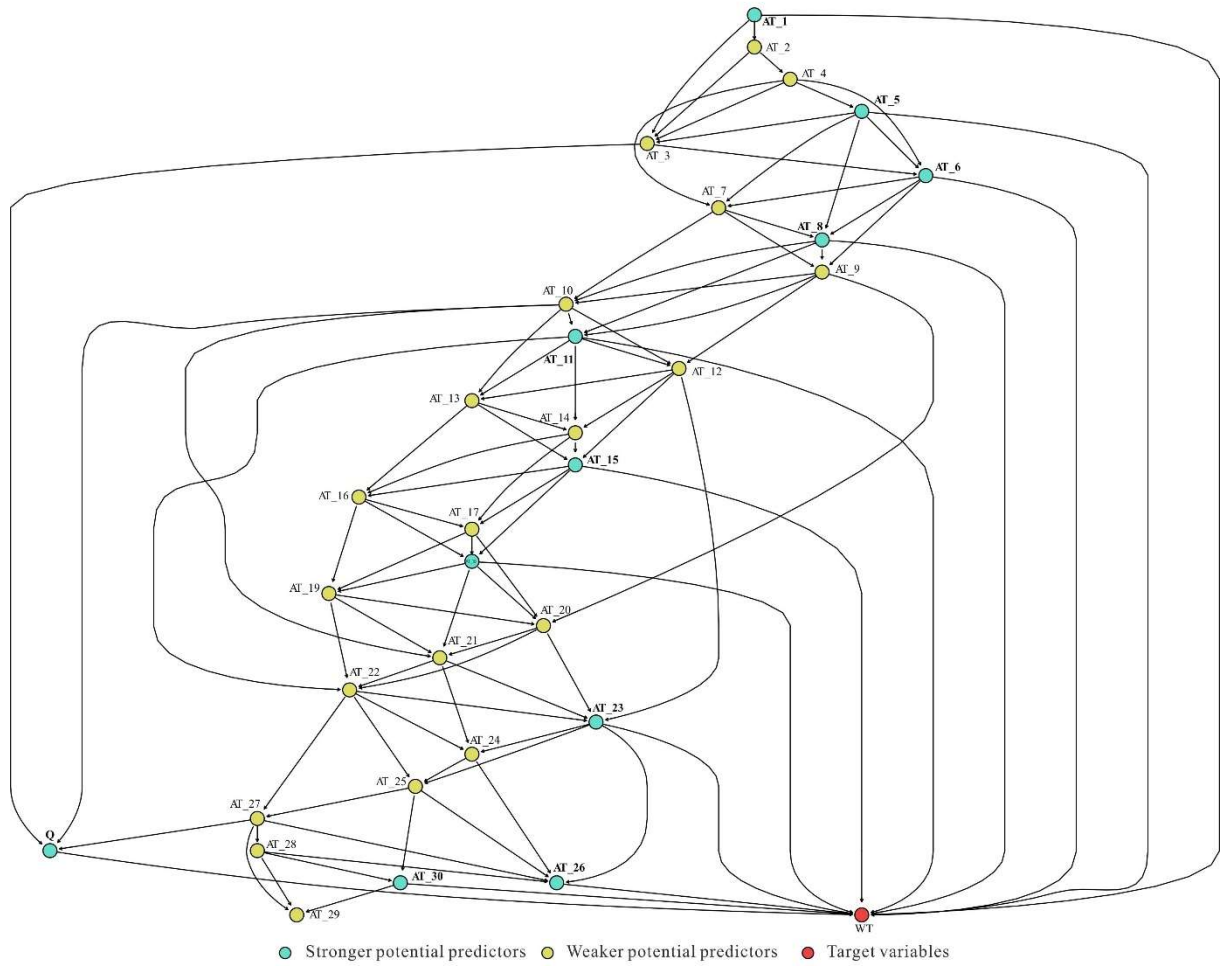

**Figure S1(f)** Typical network structure obtained for July. Notations for the variables are as follows: Water temperature ( $WT$ ), discharge ( $Q$ ).  $AT_1$ ,  $AT_2$ , ...,  $AT_{30}$  represent the lag-1, lag-2, ..., lag-30 for air temperature ( $AT$ ) series. The nodes denoted with blue circle are selected as final potential predictors.  $WT$  is target variable while other variables are set as input variables.

Typical network structure obtained for August

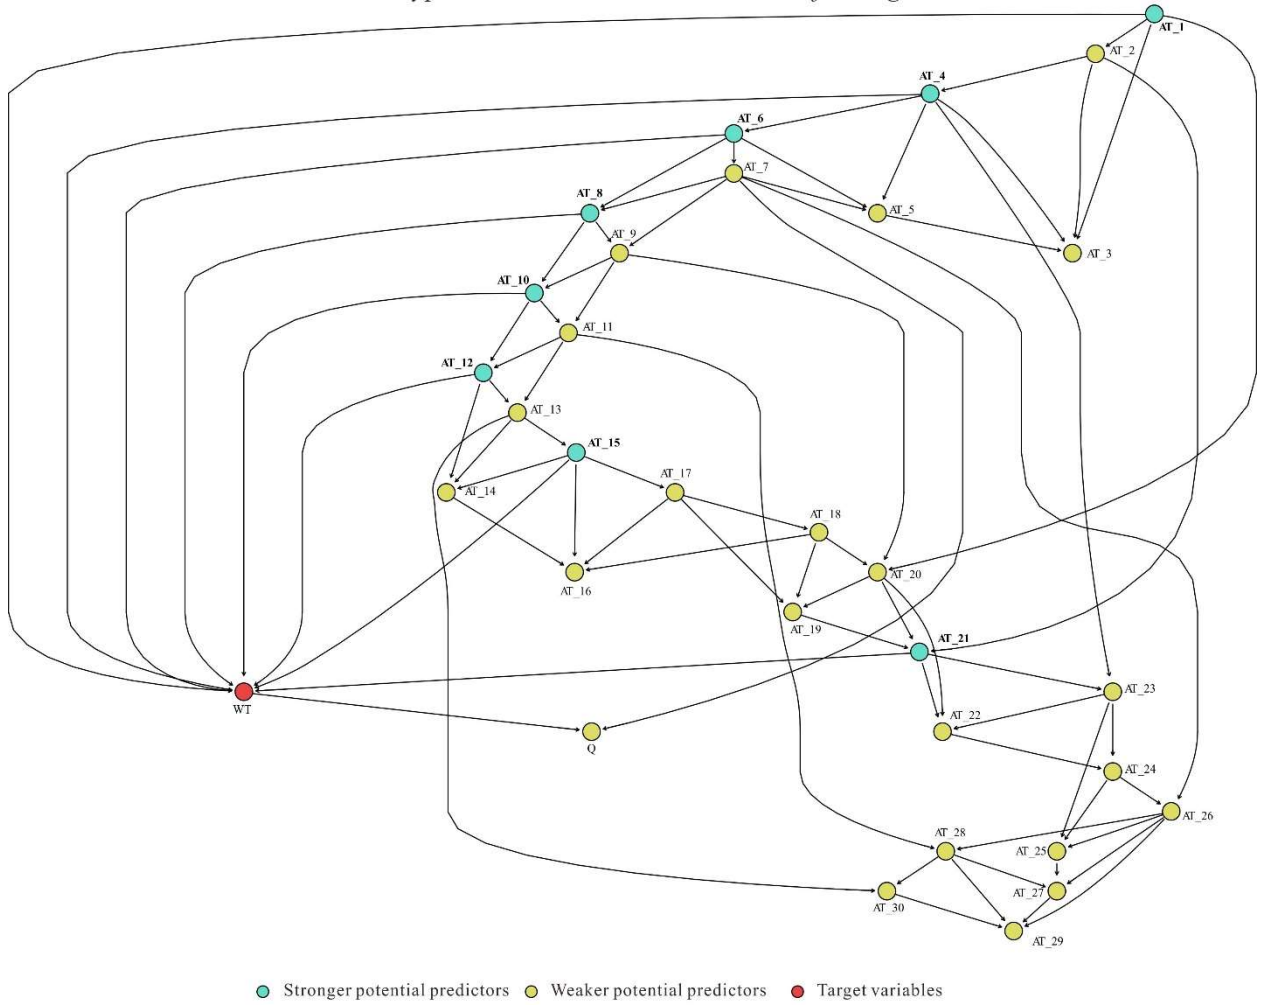

**Figure S1(g)** Typical network structure obtained for August. Notations for the variables are as follows: Water temperature ( $WT$ ), discharge ( $Q$ ).  $AT_1, AT_2, \dots, AT_{30}$  represent the lag-1, lag-2, ..., lag-30 for air temperature (AT) series. The nodes denoted with blue circle are selected as final potential predictors.  $WT$  is target variable while other variables are set as input variables.

*Typical network structure obtained for September*

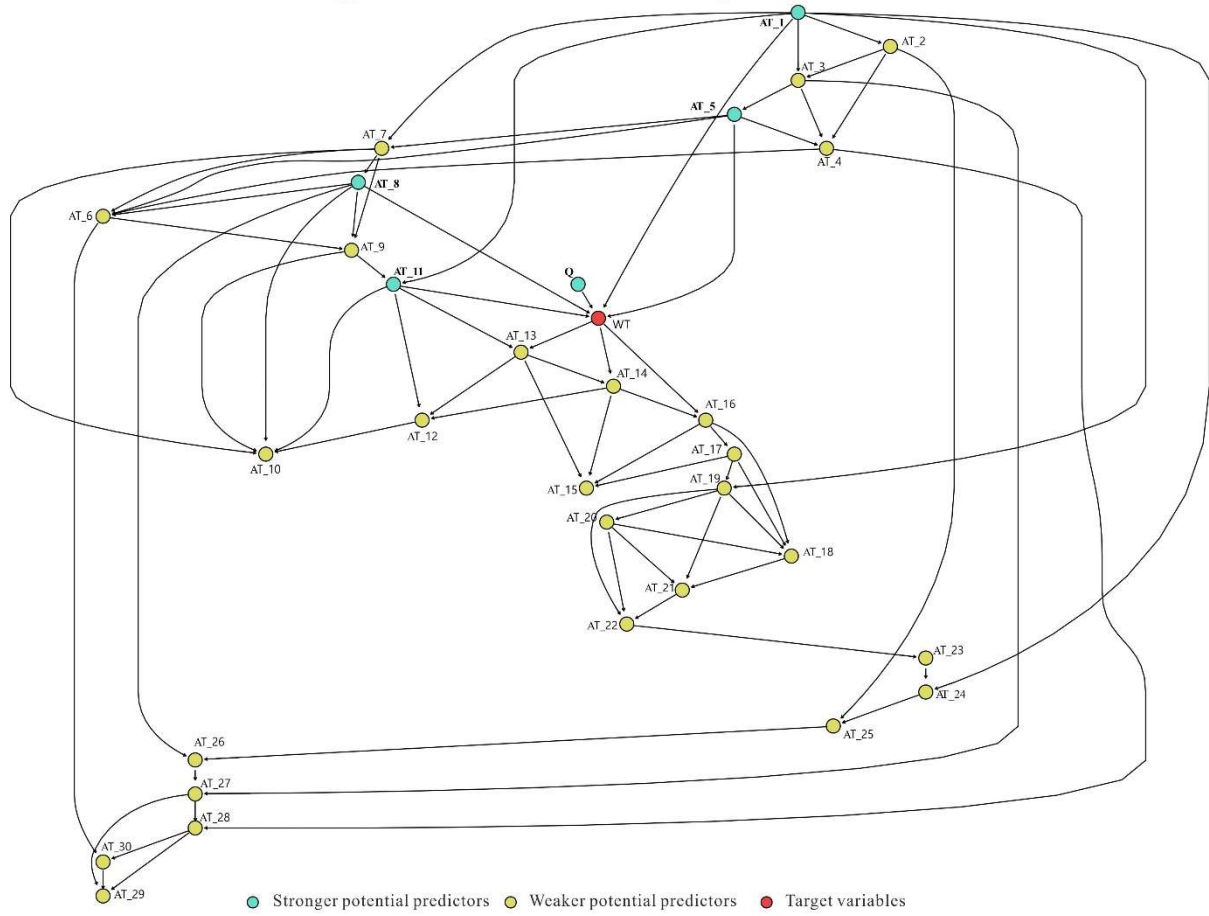

**Figure S1(h)** Typical network structure obtained for September. Notations for the variables are as follows: Water temperature (*WT*), discharge (*Q*). *AT\_1*, *AT\_2*, ..., *AT\_30* represent the lag-1, lag-2, ..., lag-30 for air temperature (*AT*) series. The nodes denoted with blue circle are selected as final potential predictors. *WT* is target variable while other variables are set as input variables.

*Typical network structure obtained for October*

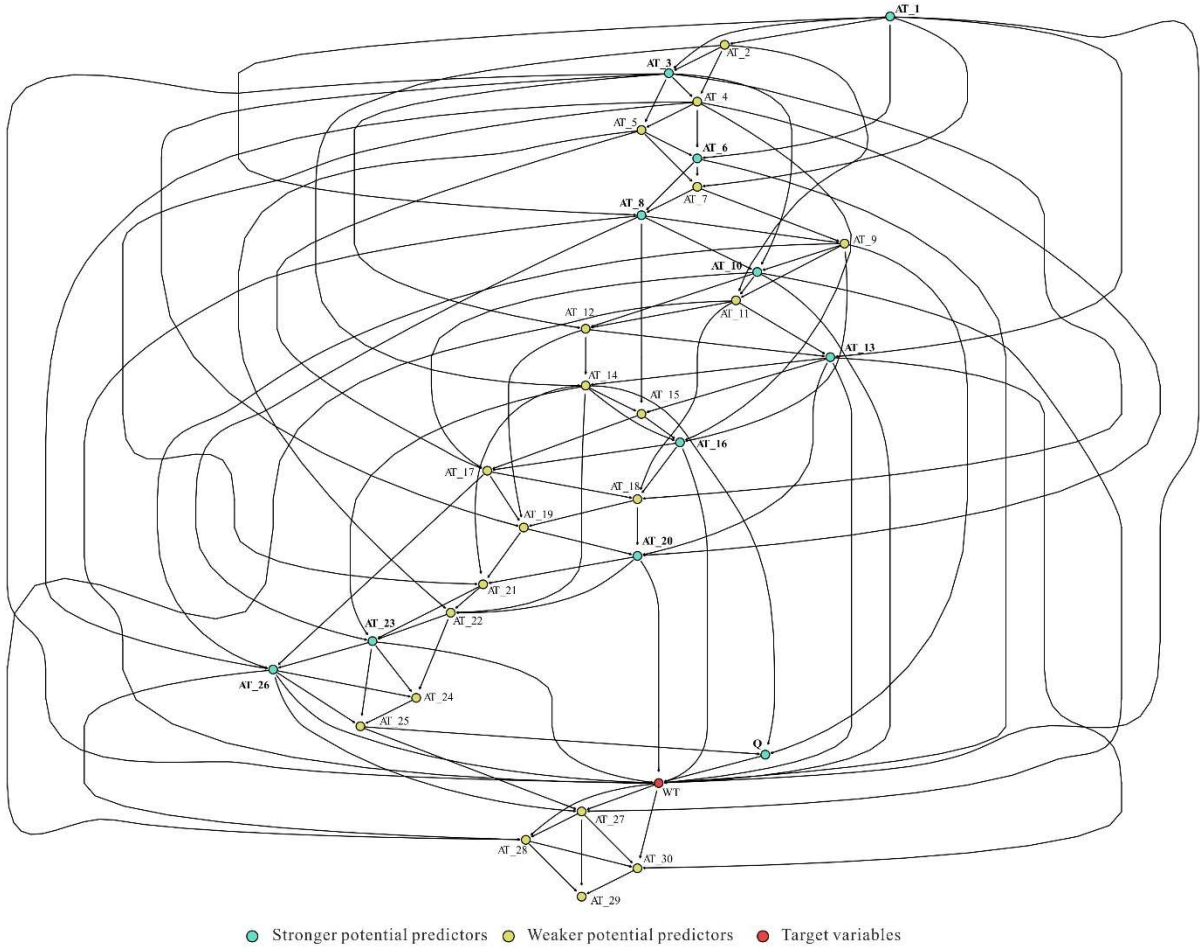

**Figure S1(i)** Typical network structure obtained for October. Notations for the variables are as follows: Water temperature ( $WT$ ), discharge ( $Q$ ).  $AT_1, AT_2, \dots, AT_{30}$  represent the lag-1, lag-2,  $\dots$ , lag-30 for air temperature ( $AT$ ) series. The nodes denoted with blue circle are selected as final potential predictors.  $WT$  is target variable while other variables are set as input variables.

Typical network structure obtained for November

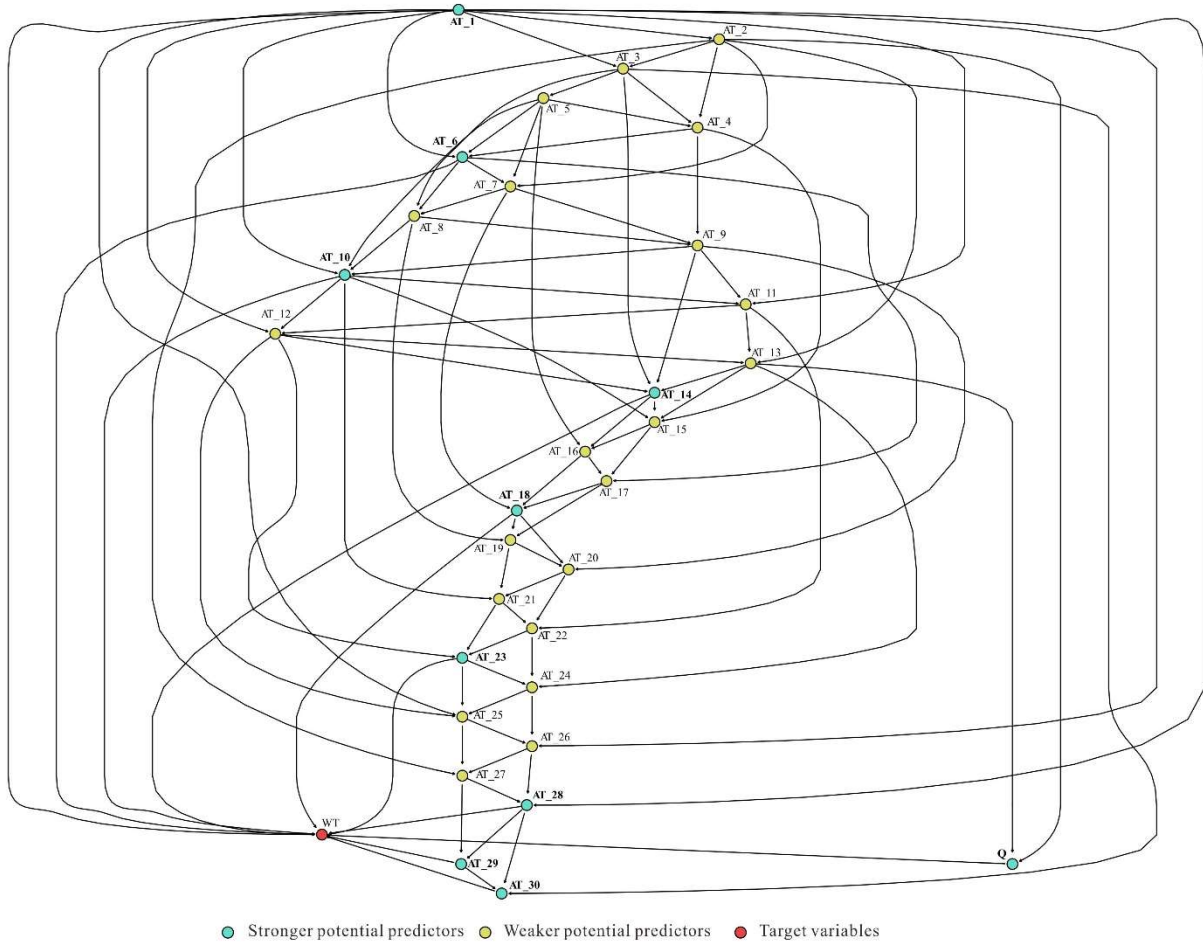

**Figure S1(j)** Typical network structure obtained for November. Notations for the variables are as follows: Water temperature (*WT*), discharge (*Q*). *AT\_1*, *AT\_2*, ..., *AT\_30* represent the lag-1, lag-2, ..., lag-30 for air temperature (*AT*) series. The nodes denoted with blue circle are selected as final potential predictors. *WT* is target variable while other variables are set as input variables.

Typical network structure obtained for December

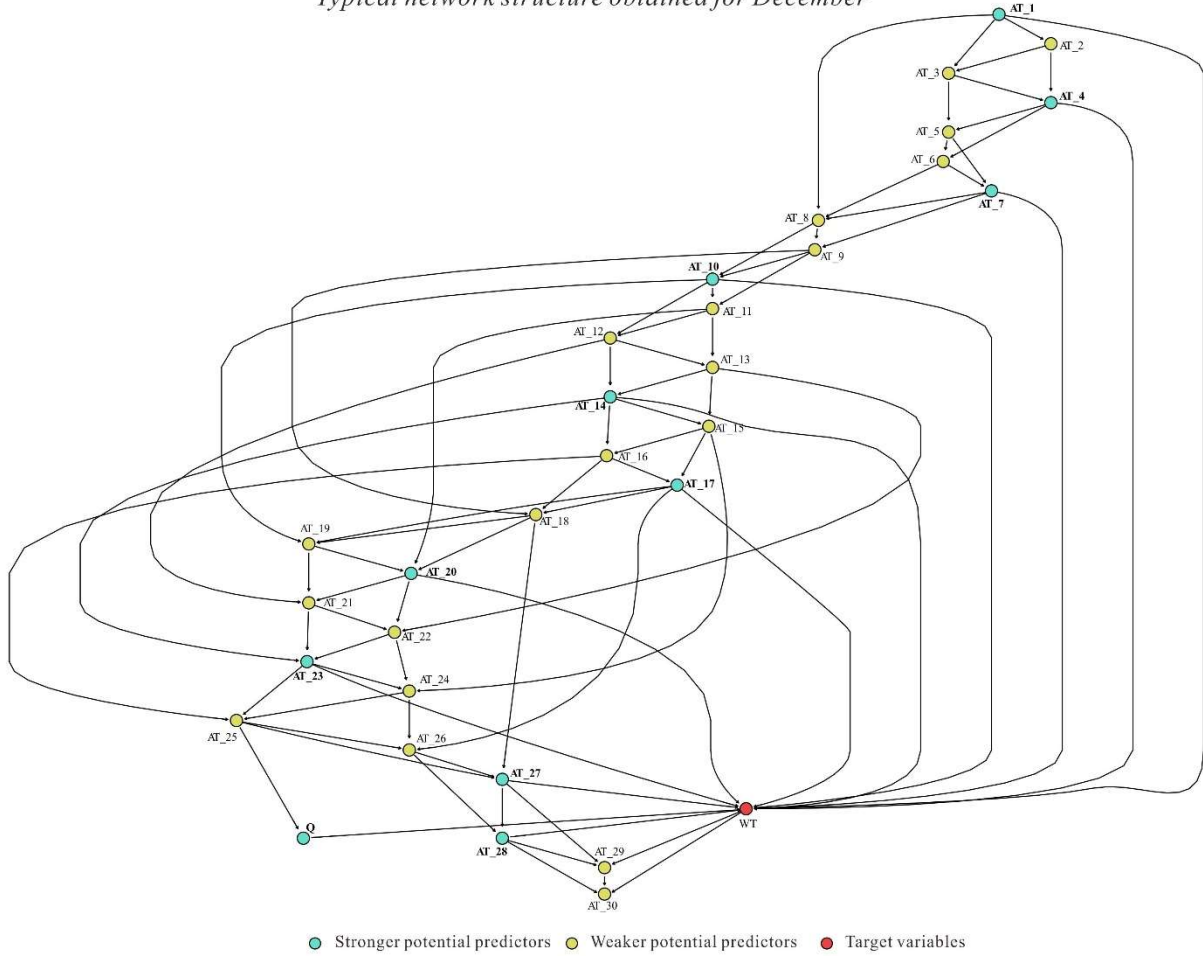

**Figure S1(k)** Typical network structure obtained for December. Notations for the variables are as follows: Water temperature (*WT*), discharge (*Q*). *AT\_1*, *AT\_2*, ..., *AT\_30* represent the lag-1, lag-2, ..., lag-30 for air temperature (*AT*) series. The nodes denoted with blue circle are selected as final potential predictors. *WT* is target variable while other variables are set as input variables.
